# Supplementary material
Source: publisher site journal article supplement (https://www.dovepress.com/article/466731)
Supplement: Supplementary file 1 [file get_supplementary_file.php]

## Supplementary Table 1: Database search strategy

### Summary

| Databases                                     | Jan 1 <sup>st</sup> 2000 to August 2 <sup>nd</sup> 2022 | August 1 <sup>st</sup> 2022 to June 27 <sup>th</sup> 2023 | Jan 1 <sup>st</sup> 2000 to June 27 <sup>th</sup> 2023 |
|-----------------------------------------------|---------------------------------------------------------|-----------------------------------------------------------|--------------------------------------------------------|
| Wiley Cochrane Database of Systematic Reviews | 268                                                     | 11                                                        | 279                                                    |
| EBSCOhost CINAHL Complete                     | 121                                                     | 9                                                         | 130                                                    |
| Web of Science Core Collection                | 506                                                     | 56                                                        | 562                                                    |
| APA PsycInfo                                  | 3                                                       | 1                                                         | 4                                                      |
| Ovid EMBASE                                   | 763                                                     | 194                                                       | 957                                                    |
| Ovid MEDLINE(R) ALL                           | 388                                                     | 24                                                        | 412                                                    |
| <b>Total including duplicates</b>             | <b>2049</b>                                             | <b>295</b>                                                | <b>2344</b>                                            |

### Wiley Cochrane Database of Systematic Reviews

| ID  | Search                                                                                                                                                                           |
|-----|----------------------------------------------------------------------------------------------------------------------------------------------------------------------------------|
| #1  | [mh "Surgical Procedures, Operative"]                                                                                                                                            |
| #2  | (surger* or surgical* or operation? or postsurg* or postoperati* or perioperati*):ti,ab,kw                                                                                       |
| #3  | #1 OR #2                                                                                                                                                                         |
| #4  | ((pain OR neuralgia*) NEAR (long term OR longterm OR recur* OR persist* OR followup OR follow up OR longitudinal OR chronic* or trajector*)):ti,ab,kw                            |
| #5  | [mh "Chronic Pain"]                                                                                                                                                              |
| #6  | [mh "Pain, Postoperative"]                                                                                                                                                       |
| #7  | (post-surg* pain NEAR ("long-term" or chronic or long term or longterm or recur* or persist* or followup or follow up or longitudinal or chronic* or trajector*)):ti,ab,kw       |
| #8  | ("post-operative pain" NEAR ("long-term" or chronic or long term or longterm or recur* or persist* or followup or follow up or longitudinal or chronic* or trajector*)):ti,ab,kw |
| #9  | #4 OR #5 OR #6 OR #7 OR #8                                                                                                                                                       |
| #10 | [mh "Risk Factors"]                                                                                                                                                              |
| #11 | [mh "Risk Assessment"]                                                                                                                                                           |
| #12 | [mh "Health Risk Behaviors"]                                                                                                                                                     |
| #13 | (risk score* or risk factor* or risk assess* or relative risk* or risk analys* or protective factor* or predictor* or risk* behavio?r or risk* health behavio?r):ti,ab,kw        |
| #14 | #10 OR #11 OR #12 OR #13                                                                                                                                                         |
| #15 | #3 AND #9 AND #14                                                                                                                                                                |

Search Date August 2, 2022: 268 results were retrieved.

Search Date June 27, 2023: additional 11 results were retrieved using the same search strategy.

### EBSCOhost CINAHL Complete

| #  | Query                                                                                                                                                                            | Limiters/Expanders                                                     | Results |
|----|----------------------------------------------------------------------------------------------------------------------------------------------------------------------------------|------------------------------------------------------------------------|---------|
| S1 | (MH "Surgery, Operative+")                                                                                                                                                       | Expanders - Apply equivalent subjects<br>Search modes - Boolean/Phrase | 744,637 |
| S2 | TI ( surger* or surgical* or operation? or postsurg* or postoperati* or perioperati* ) OR AB ( surger* or surgical* or operation? or postsurg* or postoperati* or perioperati* ) | Expanders - Apply equivalent subjects<br>Search modes - Boolean/Phrase | 525,745 |
| S3 | S1 OR S2                                                                                                                                                                         | Expanders - Apply equivalent subjects<br>Search modes - Boolean/Phrase | 994,757 |
| S4 | TI ( (pain or neuralgia*) N5 (long term or longterm or recur* or persist* or followup or follow up or longitudinal or chronic* or trajector* ) ) OR AB ( (pain or                | Expanders - Apply equivalent subjects<br>Search modes - Boolean/Phrase | 52,869  |

|     |                                                                                                                                                                                                                                                                                                                                                    |                                                                                                                                                                                                 |         |
|-----|----------------------------------------------------------------------------------------------------------------------------------------------------------------------------------------------------------------------------------------------------------------------------------------------------------------------------------------------------|-------------------------------------------------------------------------------------------------------------------------------------------------------------------------------------------------|---------|
|     | neuralgia*) N5 (long term or longterm or recur* or persist* or followup or follow up or longitudinal or chronic* or trajector* ) )                                                                                                                                                                                                                 |                                                                                                                                                                                                 |         |
| S5  | (MH "Chronic Pain")                                                                                                                                                                                                                                                                                                                                | Expanders - Apply equivalent subjects<br>Search modes - Boolean/Phrase                                                                                                                          | 25,572  |
| S6  | (MH "Postoperative Pain")                                                                                                                                                                                                                                                                                                                          | Expanders - Apply equivalent subjects<br>Search modes - Boolean/Phrase                                                                                                                          | 20,239  |
| S7  | TI ( "post-surg* pain" N2 ("long-term" or chronic or long term or longterm or recur* or persist* or followup or follow up or longitudinal or chronic* or trajector* ) ) OR AB ( "post-surg* pain" N2 ("long-term" or chronic or long term or longterm or recur* or persist* or followup or follow up or longitudinal or chronic* or trajector* ) ) | Expanders - Apply equivalent subjects<br>Search modes - Boolean/Phrase                                                                                                                          | 113     |
| S8  | TI ( "post-surg* pain" N2 ("long-term" or chronic or long term or longterm or recur* or persist* or followup or follow up or longitudinal or chronic* or trajector* ) ) OR AB ( "post-surg* pain" N2 ("long-term" or chronic or long term or longterm or recur* or persist* or followup or follow up or longitudinal or chronic* or trajector* ) ) | Expanders - Apply equivalent subjects<br>Search modes - Boolean/Phrase                                                                                                                          | 113     |
| S9  | S4 OR S5 OR S6 OR S7 OR S8                                                                                                                                                                                                                                                                                                                         | Expanders - Apply equivalent subjects<br>Search modes - Boolean/Phrase                                                                                                                          | 78,580  |
| S10 | (MH "Risk Factors+")                                                                                                                                                                                                                                                                                                                               | Expanders - Apply equivalent subjects<br>Search modes - Boolean/Phrase                                                                                                                          | 227,038 |
| S11 | (MH "Risk Assessment")                                                                                                                                                                                                                                                                                                                             | Expanders - Apply equivalent subjects<br>Search modes - Boolean/Phrase                                                                                                                          | 0       |
| S12 | (MH "Risk Taking Behavior")                                                                                                                                                                                                                                                                                                                        | Expanders - Apply equivalent subjects<br>Search modes - Boolean/Phrase                                                                                                                          | 21,974  |
| S13 | TI ( risk score* or risk factor* or risk assess* or relative risk* or risk analys* or protective factor* or predictor* or risk* behavio?r or risk* health behavio?r ) OR AB ( risk score* or risk factor* or risk assess* or relative risk* or risk analys* or protective factor* or predictor* or risk* behavio?r or risk* health behavio?r )     | Expanders - Apply equivalent subjects<br>Search modes - Boolean/Phrase                                                                                                                          | 405,936 |
| S14 | S10 OR S11 OR S12 OR S13                                                                                                                                                                                                                                                                                                                           | Expanders - Apply equivalent subjects<br>Search modes - Boolean/Phrase                                                                                                                          | 631,678 |
| S15 | S3 AND S9 AND S14                                                                                                                                                                                                                                                                                                                                  | Expanders - Apply equivalent subjects<br>Search modes - Boolean/Phrase                                                                                                                          | 2,736   |
| S16 | S15 NOT ( (MH "Child+") or (MH "Adolescence") ) NOT (MH "Adult+")                                                                                                                                                                                                                                                                                  | Expanders - Apply equivalent subjects<br>Search modes - Boolean/Phrase                                                                                                                          | 905     |
| S17 | S15 NOT ( (MH "Child+") or (MH "Adolescence") ) NOT (MH "Adult+")                                                                                                                                                                                                                                                                                  | Limiters - Published Date: 20000101-20221231;<br>English Language<br>Expanders - Apply equivalent subjects<br>Search modes - Boolean/Phrase                                                     | 857     |
| S18 | S15 NOT ( (MH "Child+") or (MH "Adolescence") ) NOT (MH "Adult+")                                                                                                                                                                                                                                                                                  | Limiters - Published Date: 20000101-20221231;<br>English Language; Publication Type: Meta Analysis, Systematic Review<br>Expanders - Apply equivalent subjects<br>Search modes - Boolean/Phrase | 121     |

|     |                 |                                                                                                                                                                                                    |       |
|-----|-----------------|----------------------------------------------------------------------------------------------------------------------------------------------------------------------------------------------------|-------|
| S19 | scoping review* | Limiters - Published Date: 20000101-20221231;<br>English Language; Publication Type: Meta<br>Analysis, Systematic Review<br>Expanders - Apply equivalent subjects<br>Search modes - Boolean/Phrase | 5,158 |
| S20 | S17 AND S19     | Expanders - Apply equivalent subjects<br>Search modes - Boolean/Phrase                                                                                                                             | 1     |
| S21 | S18 OR S20      | Expanders - Apply equivalent subjects<br>Search modes - Boolean/Phrase                                                                                                                             | 121   |

Search Date August 2, 2022: 121 results were retrieved.

Search Date June 27, 2023: additional 9 results were retrieved using the same search strategy.

## Web of Science Core Collection

surger\* or surgical\* or operation? or postsurg\* or postoperati\* or perioperati\* (Topic) and pain or neuralgia\* (Topic) and "long term" OR longterm OR recur\* OR persist\* OR followup OR "follow up" OR longitudinal OR chronic\* or trajector\* (Topic) and "risk score\*" or "risk factor\*" or "risk assess\*" or "relative risk\*" or "risk analys\*" or "protective factor\*" or predictor\* or "risk\* behavio?r" or "risk\* health behavio?r" (Topic) and English (Language) and 2000-01-01/2022-08-02 (Publication Date) and "meta-analysis" "meta-analyses" or "meta analysis" or "meta analyses" or "systematic review\*" or "scoping review\*" (All Fields)

Search Date August 2, 2022: 506 results were retrieved.

Search Date June 27, 2023: additional 56 results were retrieved using the same search strategy.

| APA PsycInfo 1806 to July Week 4 2022 |                                                                                                                                                                              | Results |
|---------------------------------------|------------------------------------------------------------------------------------------------------------------------------------------------------------------------------|---------|
| 1                                     | exp Surgery/                                                                                                                                                                 | 78365   |
| 2                                     | (surger* or surgical* or operation? or postsurg* or postoperati* or perioperati*).mp.                                                                                        | 104123  |
| 3                                     | 1 or 2                                                                                                                                                                       | 155934  |
| 4                                     | ((pain or neuralgia*) adj5 (long term or longterm or recur* or persist* or followup or follow up or longitudinal or chronic* or trajector*)).mp.                             | 29268   |
| 5                                     | exp Chronic Pain/                                                                                                                                                            | 15161   |
| 6                                     | ("post-surg* pain" adj2 ("long-term" or chronic or long term or longterm or recur* or persist* or followup or follow up or longitudinal or chronic* or trajector*)).mp.      | 47      |
| 7                                     | ("post-operative pain" adj2 ("long-term" or chronic or long term or longterm or recur* or persist* or followup or follow up or longitudinal or chronic* or trajector*)).mp.  | 19      |
| 8                                     | 4 or 5 or 6 or 7                                                                                                                                                             | 29268   |
| 9                                     | exp Risk Factors/                                                                                                                                                            | 92877   |
| 10                                    | exp Risk Assessment/                                                                                                                                                         | 14977   |
| 11                                    | exp Health Risk Behavior/                                                                                                                                                    | 3299    |
| 12                                    | (risk score* or risk factor* or risk assess* or relative risk* or risk analys* or protective factor* or predictor* or risk* behavio?r or risk* health behavio?r).mp.         | 373598  |
| 13                                    | 9 or 10 or 11 or 12                                                                                                                                                          | 373598  |
| 14                                    | 3 and 8 and 13                                                                                                                                                               | 324     |
| 15                                    | (adult* or "middle aged" or elderly or senior* or aged).mp. [mp=title, abstract, heading word, table of contents, key concepts, original title, tests & measures, mesh word] | 1326232 |
| 16                                    | 14 and 15                                                                                                                                                                    | 160     |
| 17                                    | limit 16 to (english language and ("0830 systematic review" or 1200 meta analysis or 1300 metasyntesis) and yr="2000 -Current")                                              | 3       |
| 18                                    | scoping review*.mp.                                                                                                                                                          | 3486    |
| 19                                    | 16 and 18                                                                                                                                                                    | 0       |

Search Date August 5, 2022: 3 results retrieved.

Search Date June 27, 2023: one additional result was retrieved using the same search strategy.

| <b>Ovid Embase 1974 to 2022 August 04</b> |                                                                                                                                                                                                                           | <b>Results</b> |
|-------------------------------------------|---------------------------------------------------------------------------------------------------------------------------------------------------------------------------------------------------------------------------|----------------|
| 1                                         | exp surgery/ or exp general surgery/                                                                                                                                                                                      | 5426410        |
| 2                                         | (surgical* or surger*).fs.                                                                                                                                                                                                | 2247925        |
| 3                                         | (surger* or surgical* or operation? or postsurg* or postoperati* or perioperati*).mp.                                                                                                                                     | 4975225        |
| 4                                         | 1 or 2 or 3                                                                                                                                                                                                               | 6715445        |
| 5                                         | ((pain or neuralgia*) adj5 (long term or longterm or recur* or persist* or followup or follow up or longitudinal or chronic* or trajector*)).mp.                                                                          | 192659         |
| 6                                         | exp chronic pain/                                                                                                                                                                                                         | 71180          |
| 7                                         | exp postoperative pain/                                                                                                                                                                                                   | 80616          |
| 8                                         | ("post-surg* pain" adj2 ("long-term" or chronic or long term or longterm or recur* or persist* or followup or follow up or longitudinal or chronic* or trajector*)).mp.                                                   | 482            |
| 9                                         | ("post-operative pain" adj2 ("long-term" or chronic or long term or longterm or recur* or persist* or followup or follow up or longitudinal or chronic* or trajector*)).mp.                                               | 226            |
| 10                                        | 5 or 6 or 7 or 8 or 9                                                                                                                                                                                                     | 263308         |
| 11                                        | exp risk factor/                                                                                                                                                                                                          | 1237979        |
| 12                                        | exp risk assessment/                                                                                                                                                                                                      | 678506         |
| 13                                        | exp high risk behavior/                                                                                                                                                                                                   | 30780          |
| 14                                        | (risk score* or risk factor* or risk assess* or relative risk* or risk analys* or protective factor* or predictor* or risk* behavio?r or risk* health behavio?r).mp.                                                      | 2769310        |
| 15                                        | 11 or 13 or 12                                                                                                                                                                                                            | 1774099        |
| 16                                        | 4 and 10 and 15                                                                                                                                                                                                           | 8030           |
| 17                                        | 16 not (exp juvenile/ not exp adult/)                                                                                                                                                                                     | 7693           |
| 18                                        | limit 17 to (english language and yr="2000 -Current")                                                                                                                                                                     | 7171           |
| 19                                        | limit 18 to (meta analysis or "systematic review")                                                                                                                                                                        | 760            |
| 20                                        | "scoping review*".mp. [mp=title, abstract, heading word, drug trade name, original title, device manufacturer, drug manufacturer, device trade name, keyword heading word, floating subheading word, candidate term word] | 16064          |
| 21                                        | 18 and 20                                                                                                                                                                                                                 | 7              |
| 22                                        | 19 or 21                                                                                                                                                                                                                  | 763            |

Search Date August 5, 2022: 763 results retrieved.

Search Date June 27, 2023: additional 194 results were retrieved using the same search strategy.

| <b>Ovid MEDLINE(R) ALL 1946 to August 04, 2022</b> |                                                                                                                                                                             | <b>Results</b> |
|----------------------------------------------------|-----------------------------------------------------------------------------------------------------------------------------------------------------------------------------|----------------|
| 1                                                  | exp Surgical Procedures, Operative/                                                                                                                                         | 3449099        |
| 2                                                  | (surgical* or surger*).fs.                                                                                                                                                  | 2186299        |
| 3                                                  | (surger* or surgical* or operation? or postsurg* or postoperati* or perioperati*).mp.                                                                                       | 3804800        |
| 4                                                  | 1 or 2 or 3                                                                                                                                                                 | 5163254        |
| 5                                                  | ((pain or neuralgia*) adj5 (long term or longterm or recur* or persist* or followup or follow up or longitudinal or chronic* or trajector*)).mp.                            | 118473         |
| 6                                                  | exp Chronic Pain/                                                                                                                                                           | 20383          |
| 7                                                  | Pain, postoperative/                                                                                                                                                        | 45827          |
| 8                                                  | ("post-surg* pain" adj2 ("long-term" or chronic or long term or longterm or recur* or persist* or followup or follow up or longitudinal or chronic* or trajector*)).mp.     | 235            |
| 9                                                  | ("post-operative pain" adj2 ("long-term" or chronic or long term or longterm or recur* or persist* or followup or follow up or longitudinal or chronic* or trajector*)).mp. | 104            |
| 10                                                 | 5 or 6 or 7 or 8 or 9                                                                                                                                                       | 159580         |
| 11                                                 | exp Risk Factors/                                                                                                                                                           | 932933         |
| 12                                                 | exp Risk Assessment/ or exp Health Risk Behaviors/                                                                                                                          | 305854         |
| 13                                                 | (risk score* or risk factor* or risk assess* or relative risk* or risk analys* or protective factor* or predictor* or risk* behavio?r or risk* health behavio?r).mp.        | 1960842        |
| 14                                                 | 11 or 12 or 13                                                                                                                                                              | 1964376        |

|    |                                                                    |       |
|----|--------------------------------------------------------------------|-------|
| 15 | 4 and 10 and 14                                                    | 6873  |
| 16 | 15 not ((exp infant/ or exp child/ or adolescent/) not exp adult/) | 6459  |
| 17 | limit 16 to (english language and yr="2000 -Current")              | 5719  |
| 18 | limit 17 to (meta analysis or "systematic review")                 | 384   |
| 19 | scoping review*.mp.                                                | 15337 |
| 20 | 17 and 19                                                          | 4     |
| 21 | 18 or 20                                                           | 388   |

Search Date August 5, 2022: 388 results were retrieved.

Search Date June 27, 2023: additional 24

## Supplementary table 2: List of extracted data from the 36 included reviews

### 2A: Study characteristics

| Reference                          | Review type | Guideline used         | Protocol registration                  | End date of search (start date limit) | N primary studies                                      | Type of studies                                                                                                                                                                                      |
|------------------------------------|-------------|------------------------|----------------------------------------|---------------------------------------|--------------------------------------------------------|------------------------------------------------------------------------------------------------------------------------------------------------------------------------------------------------------|
| Achttien 2021 <sup>17</sup>        | SyR         | PRISMA                 | Yes, PROSPERO<br>CRD42015023430        | 2020-Sep-20                           | 16                                                     | Observational (31 prospective cohort)                                                                                                                                                                |
| Andreoletti 2022 <sup>18</sup>     | SyR and MA  | PRISMA, MOOSE          | Yes, PROSPERO 2020<br>CRD 42020173427  | 2021-Mar-16                           | 71                                                     | Observational (prospective and retrospective, cohort and cross-sectional)                                                                                                                            |
| Ashooron 2023 <sup>19</sup>        | SyR and MA  | MOOSE                  | Yes, PROSPERO<br>CRD42018065943        | 2021-Apr-30                           | 30                                                     | Observational (cohort and case-control studies)                                                                                                                                                      |
| Burns 2015 <sup>20</sup>           | SyR         |                        | No                                     | 2014-Aug-25                           | 6                                                      | Observational (2 prospective cohort and 4 case-control studies)                                                                                                                                      |
| Celestin 2009 <sup>21</sup>        | SyR         |                        | No                                     | 2008-Aug-01                           | 25                                                     | Observational (prospective studies)                                                                                                                                                                  |
| Chidambaran 2020 <sup>22</sup>     | SyR and MA  | STREGA<br>PRISMA       | No                                     | 2017-Dec (2001-Jan)                   | 21 (9 MA)                                              | Observational (14 prospective, 6 retrospective cohort studies, 1 case control study)                                                                                                                 |
| Clephas 2023 <sup>23</sup>         | SyR and MA  | PRISMA                 | Yes, PROSPERO<br>CRD42021227888        | 2022-Jun-27                           | 56                                                     | Interventional (28 RCT) and observational (12 retrospective and 16 prospective studies)                                                                                                              |
| Compagnoni 2019 <sup>24</sup>      | SyR         | PRISMA                 | Yes, PROSPERO 2019,<br>CRD42019121180. | 2019-Feb                              | 4                                                      | Observational ( 1 prospective and 3 retrospective studies)                                                                                                                                           |
| Denboer 2006 <sup>25</sup>         | SyR         | not specified          | No                                     | Not recorded                          | 11                                                     | Observational (prospective cohort)                                                                                                                                                                   |
| D'Onghia 2021 <sup>26</sup>        | SyR and MA  | PRISMA                 | No                                     | 2020-Nov-20                           | 27 (19 MA)                                             | Interventional (RCT, quasi-RCTm) and observational (prospective or retrospective cohort)                                                                                                             |
| Dorow 2017 <sup>27</sup>           | SyR         | PRISMA                 | Not specified                          | 2015-Apr                              | 21                                                     | Observational (longitudinal, prospective cohort studies)                                                                                                                                             |
| Ghoshal 2023 <sup>28</sup>         | SyR and MA  | not specified          | Yes, PROSPERO<br>CRD42020152146        | 2022-Feb-06                           | 81                                                     | Interventional and observational (prospective (69) and retrospective (12) studies)                                                                                                                   |
| Giusti 2021 <sup>29</sup>          | SyR and MA  | PRISMA                 | No                                     | 2020-Feb-21                           | 83 (73 studies)<br>(41 MA)                             | Observational (prospective (56 studies) or retrospective (17 studies), longitudinal)                                                                                                                 |
| Goplen 2019 <sup>30</sup>          | SyR and MA  | PRISMA                 | No                                     | 2018-Feb-15 (data from 2010 to 2017)  | 6                                                      | Observational (retrospective cohort studies)                                                                                                                                                         |
| Halicka 2022 <sup>31</sup>         | SyR         | PRISMA plus<br>CRD     | Yes, PROSPERO<br>CRD42020180845        | 2021-Mar 29                           | 21 (18 studies)                                        | Interventional and observational (retrospective (8), preprospective (10) studies)                                                                                                                    |
| Hernandez 2015 <sup>32</sup>       | SyR         | Cochrane collaboration | No                                     | 2013-May                              | 37                                                     | Interventional (1 RCT) and observational (prospective (30) and retrospective (2)) and systematic reviews (4)                                                                                         |
| Hinrichs-Rocker 2009 <sup>33</sup> | SyR         | Cochrane collaboration | No                                     | 2006-Jul-19 (1996-Jan)                | 50                                                     | Interventional (7 RCT) and observational (21 prospective and 21 retrospective cohortstudies, one case control study)                                                                                 |
| Innocenti 2021 <sup>34</sup>       | SyR         | PRISMA                 | Yes, PROSPERO<br>CRD42019122303        | 2020-Nov-15                           | 11                                                     | Observational (prospective cohort studies)                                                                                                                                                           |
| Lewis 2015 <sup>35</sup>           | SyR and MA  |                        | No                                     | 2012-Dec (1080)                       | 32 (28 MA)                                             | Observational (23 prospective, 5 retrospective and 4 cross-sectional studies)                                                                                                                        |
| Lim 2022 <sup>36</sup>             | SyR and MA  | PRISMA                 | No                                     | 2019-Nov-11                           | 317 (breast surgery: 100 MA; thoracic surgery: 101 MA) | Interventional (breast 26 RCT, thoracic 63 RCT) and observational (breast 48 prospective, 68 retrospective, 5 cross-sectional; thoracic 53 prospective, 53 retrospective, 2 cross-sectional studies) |
| Lungu 2016 <sup>37</sup>           | SyR         |                        | No                                     | 2015-Apr                              | 22                                                     | Observational (not specified)                                                                                                                                                                        |

|                                 |            |                               |                                                           |                              |                            |                                                                                                        |
|---------------------------------|------------|-------------------------------|-----------------------------------------------------------|------------------------------|----------------------------|--------------------------------------------------------------------------------------------------------|
| McCowat 2019 <sup>38</sup>      | SyR        | PRISMA                        | Yes, PROSPERO<br>CRD42017065098                           | 2017-May-01<br>(1997)        | 12                         | Observational (prospective cohort)                                                                     |
| McKillop 2014 <sup>39</sup>     | SyR        | not specified                 | No                                                        | 2012-May (1980)              | 13                         | Observational (longitudinal studies)                                                                   |
| Meert 2023 <sup>40</sup>        | SyR        | PRISMA                        | Yes, PROSPERO<br>CRD42022350609                           | 2022-Aug-01                  | 49                         | Interventional (2 RCTs) and observational (2 case-control, 45 prospective studies)                     |
| Moloney 2021 <sup>41</sup>      | SyR and MA | PRISMA                        | Yes, PROSPERO<br>CRD42016029834                           | 2019-Jan (1990)              | 47 (26 MA)                 | Observational (20 cross-sectional, 28 longitudinal studies)                                            |
| Ng 2021 <sup>42</sup>           | SyR and MA | PRISMA, Cochrane              | No                                                        | 2020-Jul                     | 12                         | Observational (4 prospective and 8 retrospective cohort)                                               |
| Nunez Cortes 2022 <sup>43</sup> | SyR and MA | PRISMA                        | Yes, PROSPERO<br>CRD42020181709                           | 2021-Aug-14                  | 15 (7 MA)                  | Interventional (1 RCT) and observational (13 prospective, 1 retrospective study)                       |
| O'Connor 2022 <sup>44</sup>     | SyR        | PRISMA                        | Not specified                                             | 2021-Nov-12                  | 21                         | Interventional (nonrandomized cohort trials; prospective (15); retrospective (6))                      |
| Olsen 2023 <sup>45</sup>        | SyR and MA | PRISMA                        | Yes, PROSPERO<br>CRD42018079069                           | 2023-Feb-06<br>(2000-Jan-01) | 29 (25 MA)                 | Observational (Prospective longitudinal studies)                                                       |
| Rogowsky 2022 <sup>46</sup>     | SR         | Arksey and O'Malley framework | Yes, Open Science Framework, DOI<br>10.17605/OSF.IO/KTY6Q | 2020-Dec-10                  | 17                         | Interventional (3 RCT) and observational (8 prospective and 2 retrospective cohort, 4 cross-sectional) |
| Terradas 2021 <sup>47</sup>     | SyR        | PRISMA                        | Not specified                                             | 2020-Oct-31                  | 22                         | Observational (prospective cohort studies)                                                             |
| Theunissen 2012 <sup>48</sup>   | SyR and MA | not specified                 | Not specified                                             | 2010-Oct (1958)              | 29 (15 MA)                 | Observational (prospective cohort studies)                                                             |
| Van Bougaert 2022 <sup>49</sup> | SyR        | PRISMA                        | Yes, PROSPERO<br>CRD42020130626                           | 2021-Oct                     | 24                         | Observational (4 retrospective and 19 prospective cohort studies)                                      |
| Varallo 2022 <sup>50</sup>      | SyR and MA | PRISMA                        | Yes, PROSPERO 2021<br>CRD42021272654                      | 2021-Aug-01                  | 21 (18 studies)<br>(12 MA) | Observational (16 prospective and 2 retrospective cohort, 4 abstracts)                                 |
| Wluka 2020 <sup>51</sup>        | SyR and MA | PRISMA                        | Yes, PROSPERO 2019,<br>2020 CRD42020152421                | 2020-Mar                     | 5                          | Observational (6 prospective cohort studies)                                                           |
| Zhao 2023 <sup>52</sup>         | MA         | PRISMA, MOOSE                 | Yes, PROSPERO<br>CRD42022357137                           | 2022-Apr                     | 6                          | Interventional (2 RCT) and observational (4 prospective cohort studies)                                |

Abbreviations: CRD: Centre for Reviews and Dissemination; MA: meta-analysis; SR: scoping review; SyR: systematic review

## 2B: Participant numbers and characteristics, surgery type and time

| Reference                      | Collective number of participants in primary papers | Participant age                                           | Participant sex/gender | Type of surgery (N)                                                                                                                                                            | time post-surgery             |
|--------------------------------|-----------------------------------------------------|-----------------------------------------------------------|------------------------|--------------------------------------------------------------------------------------------------------------------------------------------------------------------------------|-------------------------------|
| Achttien 2021 <sup>17</sup>    | 8,388                                               | ≥18; 18-86 age range                                      | Both gender            | lumbar spine fusion surgery                                                                                                                                                    | 1 to 2 years, 2 to 3 years    |
| Andreoletti 2022 <sup>18</sup> | 48,974                                              | >18                                                       | Both gender            | Various types (elective non-obstetric surgery) (orthopedic (11), breast surgery (14), abdominal surgery (11), hernia (13), cardia-thoracic (15), other type/mixed surgery (7)) | >3 months                     |
| Ashooron 2023 <sup>19</sup>    | 26,517                                              | ≥18                                                       | Both male and female   | TKA                                                                                                                                                                            | >3 months                     |
| Burns 2015 <sup>20</sup>       | 662 (calculated)                                    | 49-85 age range (no inclusion criteria specified for age) | Both gender            | TKA                                                                                                                                                                            | >3 months                     |
| Celestin 2009 <sup>21</sup>    | 3,228 (calculated)                                  | age not specified                                         | not specified          | Lumbar spine surgery (discectomy, laminectomy, and                                                                                                                             | follow-up 3 months to 3 years |

|                                    |                                                               |                                                            |                                                                                           |                                                                                                                                                                                                                                                                                                                                                   |                                                                                                                                                           |
|------------------------------------|---------------------------------------------------------------|------------------------------------------------------------|-------------------------------------------------------------------------------------------|---------------------------------------------------------------------------------------------------------------------------------------------------------------------------------------------------------------------------------------------------------------------------------------------------------------------------------------------------|-----------------------------------------------------------------------------------------------------------------------------------------------------------|
|                                    |                                                               |                                                            |                                                                                           | fusion (21)) or implantation of a spinal cord stimulator (4)                                                                                                                                                                                                                                                                                      |                                                                                                                                                           |
|                                    | 11,192                                                        |                                                            |                                                                                           | Various types: breast surgery (5), hernia (4), lumbar discectomy (3), spine surgery (1), TKA (1), TSA (1), TKA+THA (1), abdominal surgery (1), caesarean (1), amputation (1), other type/mixed surgeries (2)                                                                                                                                      | >3 months                                                                                                                                                 |
| Chidambaran 2020 <sup>22</sup>     |                                                               | ≥18                                                        | Both genders (8 study cohorts included only female and 3 included only male participants) |                                                                                                                                                                                                                                                                                                                                                   |                                                                                                                                                           |
| Clephas 2023 <sup>23</sup>         | 10,038                                                        | ≥18                                                        | Both male and female (proportion of women: 44%)                                           | thoracic surgery (lung and pleural surgery)                                                                                                                                                                                                                                                                                                       | >3 months                                                                                                                                                 |
| Compagnoni 2019 <sup>24</sup>      | 12,266 (calculated)                                           | adult                                                      | not specified                                                                             | Shoulder surgery                                                                                                                                                                                                                                                                                                                                  | > one year (one paper assessed only acute pain and is excluded from our analysis)                                                                         |
| Denboer 2006 <sup>25</sup>         | 1,385 (calculated)                                            | 15-70                                                      | Both gender                                                                               | Lumbar disc surgery (discectomy)                                                                                                                                                                                                                                                                                                                  | >6 months (one paper with 6 weeks follow-up is excluded from our analysis)                                                                                |
| D'Onghia 2021 <sup>26</sup>        | 1,071,015 (calculate in quantitative, qualitative not stated) | age not specified                                          | Both gender                                                                               | Orthopedic surgery (TKA (13), THA (6), shoulder (4), spine (4), knee (1), elbow (1), Carpal tunnel (2)                                                                                                                                                                                                                                            | 12 weeks to 7 years (2 papers with assessment during the first months are excluded from our analysis)                                                     |
| Dorow 2017 <sup>27</sup>           | 2,581                                                         | 15-82 years old (identified from table of primary studies) | Both gender                                                                               | Lumbar disc surgery (discectomy)                                                                                                                                                                                                                                                                                                                  | short-term (< 3 months), medium-term (> 3 months and < 12 months) and long-term (> 12 months) (data for this review are taken from medium- and long-term) |
| Ghoshal 2023 <sup>28</sup>         | 171,354                                                       | ≥18                                                        | female                                                                                    | TKR (54), THR (16), TKR+THR (11)                                                                                                                                                                                                                                                                                                                  | >3 months                                                                                                                                                 |
| Giusti 2021 <sup>29</sup>          | 40,784 (narrative synthesis); 38,894 (quantitative synthesis) | middle-aged (60.2+/-10.2 [mean+/-SD]).                     | Both (mean female percentage: 59.5%)                                                      | Various types (TKA (37), lumbar surgery (13), THR (5), hysterectomy/Gynecological surgery (4), ACD (4), Hernia repair (4), CABG (3), total shoulder arthroplasty (2), ankle and foot reconstruction (1), liver surgery (1), pelvic laparoscopy (1), meniscectomy (1), arthroscopic rotor cuff repair (1), trauma surgery (1), mixed surgeries (2) | >3 months                                                                                                                                                 |
| Goplen 2019 <sup>30</sup>          | 7,356                                                         | >20                                                        | Both male and female                                                                      | TJA (TKA (3), THA (1), both (2))                                                                                                                                                                                                                                                                                                                  | >6 months                                                                                                                                                 |
| Halicka 2022 <sup>31</sup>         | 5,780                                                         | ≥18                                                        | Both gender                                                                               | Spinal surgery                                                                                                                                                                                                                                                                                                                                    | >3 months                                                                                                                                                 |
| Hernandez 2015 <sup>32</sup>       | 43,319 (calculated)                                           | >60                                                        | Both male and female, but more females have association                                   | TKA and THA                                                                                                                                                                                                                                                                                                                                       | >4 months (3 of the systematic reviews included papers with <3 months follow-up and were excluded when possible)                                          |
| Hinrichs-Rocker 2009 <sup>33</sup> | 25,288 (calculated from 48/50 studies)                        | adult                                                      | Both gender                                                                               | Various types: hernia (11), thoracotomy (8), cholecystectomy (5), breast surgery (8), spine surgery (8), knee surgery (3), other surgeries (5)                                                                                                                                                                                                    | >3 months                                                                                                                                                 |
| Innocenti 2021 <sup>34</sup>       | 952 (calculated)                                              | ≥18                                                        | not specified                                                                             | Shoulder surgery                                                                                                                                                                                                                                                                                                                                  | >3 months                                                                                                                                                 |
| Lewis 2015 <sup>35</sup>           | 29,993                                                        | 56-77 age range (no inclusion criteria)                    | Both gender                                                                               | TKA                                                                                                                                                                                                                                                                                                                                               | >3 months                                                                                                                                                 |



|                                 |                                                                      | specified for age)                                                      |                                                     |                                                                                                                                                                                                                                                                                                                  |                                                                                                                                                                                                   |
|---------------------------------|----------------------------------------------------------------------|-------------------------------------------------------------------------|-----------------------------------------------------|------------------------------------------------------------------------------------------------------------------------------------------------------------------------------------------------------------------------------------------------------------------------------------------------------------------|---------------------------------------------------------------------------------------------------------------------------------------------------------------------------------------------------|
| Lim 2022 <sup>36</sup>          | 17,524<br>(10,980 for breast surgery;<br>6,544 for thoracic surgery) | ≥18                                                                     | Both gender                                         | Breast surgery (147) and thoracic surgery (170)                                                                                                                                                                                                                                                                  | >3 months                                                                                                                                                                                         |
| Lungu 2016 <sup>37</sup>        | 12,660<br>(calculated)                                               | older age                                                               | Both gender                                         | THA                                                                                                                                                                                                                                                                                                              | >3 months                                                                                                                                                                                         |
| McCowat 2019 <sup>38</sup>      | 3,452<br>(calculated)                                                | >18                                                                     | women                                               | Breast cancer surgery                                                                                                                                                                                                                                                                                            | >3 months for chronic pain (data on acute pain excluded from our analysis)                                                                                                                        |
| McKillop 2014 <sup>39</sup>     | unclear - overlap of cohorts in individual studies                   | adults                                                                  | not specified                                       | Lumbar spinal stenosis                                                                                                                                                                                                                                                                                           | 3, 6, 12 months                                                                                                                                                                                   |
| Meert 2023 <sup>40</sup>        | 47,255<br>(Calculated)                                               | ≥18                                                                     | Both gender                                         | TKA                                                                                                                                                                                                                                                                                                              | >6 months                                                                                                                                                                                         |
| Moloney 2021 <sup>41</sup>      | 15,987                                                               | ≥18                                                                     | females                                             | Breast Cancer surgery                                                                                                                                                                                                                                                                                            | 0–7 days (acute pain), 7 days to 3 months (subacute pain), >3 months to 12 months (early chronic), >12 months (late chronic) (we only used data for early and late chronic pain for our analysis) |
| Ng 2021 <sup>42</sup>           | 29,484                                                               | ≥18                                                                     | Both gender                                         | UKA                                                                                                                                                                                                                                                                                                              | >1 year (one study reported an early 30-day complication, data from this study were excluded)                                                                                                     |
| Nunez Cortes 2022 <sup>43</sup> | 2,599<br>(calculated)                                                | 46+/-9 and 62+/-12 [mean+/-SD] (no inclusion criteria specific for age) | Both gender                                         | Carpal tunnel release (CTR)                                                                                                                                                                                                                                                                                      | >3 months                                                                                                                                                                                         |
| O'Connor 2022 <sup>44</sup>     | 12,925                                                               | ≥18                                                                     | Both (proportion of females: 55%)                   | THA                                                                                                                                                                                                                                                                                                              | >3 months (studies on acute pain were excluded from our analysis)                                                                                                                                 |
| Olsen 2023 <sup>45</sup>        | 10,360                                                               | adults; range of mean age: 63-73                                        | Both (proportion of female: 49-95%)                 | TKA                                                                                                                                                                                                                                                                                                              | 3, 6, 12 months                                                                                                                                                                                   |
| Rogowsky 2022 <sup>46</sup>     | 4,640<br>(calculated),<br>(11 to 1,398 range)                        | adult                                                                   | women                                               | Breast cancer mastectomy with alloplastic implant-based reconstruction (IBR)                                                                                                                                                                                                                                     | >3 months                                                                                                                                                                                         |
| Terradas 2021 <sup>47</sup>     | 7,156                                                                | 46 to 91 age range, 67.92 [mean]                                        | Both males and females (proportion of females: 75%) | TKA, UKA                                                                                                                                                                                                                                                                                                         | 6, 12 months                                                                                                                                                                                      |
| Theunissen 2012 <sup>48</sup>   | 6,628                                                                | adult                                                                   | Both gender                                         | Various types: breast surgery (1), lumbar disc (8), inguinal hernia (1), hysterectomy (1), mastectomy (1), prostatectomy (2), nephrectomy (1), lower limb amputation (1), thoracotomy (1), knee replacement (7), hip replacement (1), Knee and hip arthroplasty (1), shoulder surgery (1), and various types (2) | >3 months                                                                                                                                                                                         |

|                                 |                  |                                      |                                                                                |                                                                                                                                                  |                                                       |
|---------------------------------|------------------|--------------------------------------|--------------------------------------------------------------------------------|--------------------------------------------------------------------------------------------------------------------------------------------------|-------------------------------------------------------|
| Van Bougaert 2022 <sup>49</sup> | 17,881           | ≥18; range of mean age range: 40-75  | Both men and women (proportion of women: 50.98%)                               | lumbar spine surgery                                                                                                                             | >3 months                                             |
| Varallo 2022 <sup>50</sup>      | 8,408            | ≥18                                  | Both (mean percentage of female: 68%)                                          | Various types: TKA (7), breast surgery (3), thoracotomy (2), THA (2), rotator cuff repair (1), THA and TKA (1), Hip surgery (1) and any type (1) | >3 months                                             |
| Wluka 2020 <sup>51</sup>        | 863 (calculated) | adults; 65.1 to 72 range of mean age | Both (proportion of women: 60% (varied from 51 to 100% in individual studies)) | TKA                                                                                                                                              | >3 months                                             |
| Zhao 2023 <sup>52</sup>         | 829              | 17-80 age range                      | females                                                                        | spine surgery for lumbar degenerative disease                                                                                                    | >6 months (data from studies <3 months were excluded) |

Abbreviations: ACDF: Anterior cervical discectomy and fusion; CABG: coronary artery bypass graft; IBR: implant-based breast reconstruction; LD: Latissimus Dorsi; THA: Total hip arthroplasty; TJA: Total Joint Arthroplasty; TKA: Total knee arthroplasty; TMJ: Temporomandibular joint disorder

## 2C: Study objective, risk factor (RF) number (N), assessment, and identification

| Reference                      | Study objective                                                                                                                                                                 | RF variables assessed in primary studies (N)                    | List of RFs assessed in primary studies                                                                                                                                                                                                                                                                                                                                                                                                                                                                         | Outcome measures | Identified RFs with association to CPSP: (N) with association/(N) assessed                                                                                                                                             |
|--------------------------------|---------------------------------------------------------------------------------------------------------------------------------------------------------------------------------|-----------------------------------------------------------------|-----------------------------------------------------------------------------------------------------------------------------------------------------------------------------------------------------------------------------------------------------------------------------------------------------------------------------------------------------------------------------------------------------------------------------------------------------------------------------------------------------------------|------------------|------------------------------------------------------------------------------------------------------------------------------------------------------------------------------------------------------------------------|
| Achtstien 2021 <sup>17</sup>   | To identify and evaluate the value of prognostic factors related to disability, pain and quality of life (QOL) for adult patients undergoing lumbar spine fusion surgery (LSFS) | 39 (include peri-surgical factors)                              | work status, sick benefits, QOL, mental health, physical health, kinesiophobia, pain belief, efficacy, pre-operative back and leg pain, straight leg raise, disability, duration of pain, opioid use, height, weight, Marriage status, type of household, parenthood, Immigrant status, dementia, age, gender, BMI, education level, smoking status, self-rated health, walking capacity, distress, alcohol consumption, exercise habits, sciatica, and various peri-operative factors                          | pain. disability | pre-operative sick leave or no work 2/6, (pre-operative leg pain has reverse effect, eg more pre-surgical leg pain - less CPSP, 5/7), catastrophizing 1/1, female gender 3/7, lower educational level 1/1, smoking 1/5 |
| Andreoletti 2022 <sup>18</sup> | To assess the risk of CPSP related to three known perioperative risk factors, age, sex, pre-operative pain in the adult population of any non-obstetric elective surgery        | 3 (specifically included in search keywords)                    | age, sex, pre-operative pain                                                                                                                                                                                                                                                                                                                                                                                                                                                                                    |                  | significant effect pre-operative pain (pain at surgical site 21/23, pain elsewhere 5/9, pain at unspecified location 9/9), younger age 12/15, female sex 11/45                                                         |
| Ashooron 2023 <sup>19</sup>    | To identify predictors of persistent pain following TKA                                                                                                                         | 151 stated in text (including peri- and post-operative factors) | age, sex, BMI, pre-operative pain, pre-op range of motion (ROM), pain catastrophizing, comorbid diabetes, race, marriage status, income, occupation, education, physical activity, pre-operative physical functioning, pre-operative mental health, anxiety (state and trait), depression, mood disorders, Comorbidities (cancer, ischemic heart disease, pulmonary and kidney disease), fibromyalgia, pain in other areas of the body, pre-operative fatigue, sleep, central sensitization, pre-operative pain | pain             | pain catastrophizing 3/3, younger age 6/15, female sex 10/16, moderate to severe pre-operative pain 5/13, non-white race 2/2, comorbid diabetes 2/3, pre-operative ROM 2/2, BMI 3/8                                    |

|                                |                                                                                                                                                                                                                                                                                                       |                                                        |                                                                                                                                                                                                                                                                                                                                                                                                                                                                                                                                 |                |                                                                                                                                                                                                                                                                                                                                                                                                                                                                                                                                                                            |
|--------------------------------|-------------------------------------------------------------------------------------------------------------------------------------------------------------------------------------------------------------------------------------------------------------------------------------------------------|--------------------------------------------------------|---------------------------------------------------------------------------------------------------------------------------------------------------------------------------------------------------------------------------------------------------------------------------------------------------------------------------------------------------------------------------------------------------------------------------------------------------------------------------------------------------------------------------------|----------------|----------------------------------------------------------------------------------------------------------------------------------------------------------------------------------------------------------------------------------------------------------------------------------------------------------------------------------------------------------------------------------------------------------------------------------------------------------------------------------------------------------------------------------------------------------------------------|
|                                |                                                                                                                                                                                                                                                                                                       |                                                        | threshold, duration of pre-surgical pain, Self-efficacy, Kinesiophobia, radiographic pattern [bilateral versus unilateral TKA, patella surface, type of implant, acute post-operative pain]                                                                                                                                                                                                                                                                                                                                     |                |                                                                                                                                                                                                                                                                                                                                                                                                                                                                                                                                                                            |
| Burns 2015 <sup>20</sup>       | To systematically review the literature that reported the prospective impact of pain catastrophizing on pain that persists $\geq 3$ months after TKA                                                                                                                                                  | 1 (specifically included in search keywords)           | pain catastrophizing                                                                                                                                                                                                                                                                                                                                                                                                                                                                                                            | pain           | pain catastrophizing 5/6                                                                                                                                                                                                                                                                                                                                                                                                                                                                                                                                                   |
| Celestin 2009 <sup>21</sup>    | To assess the strength of the evidence for the assumption that psychological variables are important predictors of pain-related and functional outcomes from lumbar surgery or spinal cord stimulator (SCS), and to identify which psychological factors are most likely to be predictive of outcomes | 24 (grouped in 4 units: pain, psych, function, others) | PAIN predictors (pain intensity, pain descriptors, and pain location); PSYCH predictors (fear of pain, pain coping, depression, anxiety, hypochondriasis, and somatization); FUNCTION predictor (activity interference, level of activity, strength measures, disability, and exercise level); OTHER predictors (demographic information (e.g., age, gender), physical examination findings, pain duration, worker's compensation status, previous surgery, cigarette smoking, job satisfaction, litigation, and abuse history) | pain, function | pain predictors include high pain levels and multiple pain locations: 4/12 positive evidence ; psych predictors include poor coping, somatization, hypochondriasis, depression, anxiety: 14/18 positive evidence and 3/18 mixed evidence; Function predictors include activity interference, disability: 4/10 positive evidence; other predictors include lower education 1/2 and pain duration 1/5 both positive evidence; other predictors include age 4/5, gender 1/2, work status 5/5, abuse history 1/1, BMI 1/1, lower education 1/2, gender 1/2, all mixed evidence |
| Chidambaran 2020 <sup>22</sup> | To systematically review, assess quality, and summarize the studies in humans that have investigated genetic factors associated with CPSP                                                                                                                                                             | 69 unique genes                                        | genetic variations                                                                                                                                                                                                                                                                                                                                                                                                                                                                                                              | pain           | genetic factors (variation in the potassium voltage-gated channel gene (KCNS1); immune responses 2/2 studies                                                                                                                                                                                                                                                                                                                                                                                                                                                               |
| Clephas 2023 <sup>23</sup>     | To identify and summarize the evidence of all prognostic factors for chronic post-surgical pain after lung and pleural surgery                                                                                                                                                                        | 45 (include peri- and post-operative factors)          | ASA score; pre-operative pain; pain catastrophizing score; age; sex; BMI; diabetes mellitus; exercise tolerance; [postoperative pain; malignant disease; chemotherapy; radiation therapy; surgery duration; anesthesia technique and surgical technique]                                                                                                                                                                                                                                                                        | pain           | pre-operative pain 2/8 high effect, female sex 18/18 moderate effect, depression 3/3 high risk, anxiety 3/3 high risk, pain catastrophizing 3/3 high risk, diabetes 2/4 mixed; no significant effect or                                                                                                                                                                                                                                                                                                                                                                    |

|                               |                                                                                                                                                                                                                                                                                                                                                                                                                   |                                                                            |                                                                                                                                                                                                                                                                                                                                                                                                                                                                                                                                                                                                         |                                                                                                 |                                                                                                                                                                                                                                                                                                                                                                                      |
|-------------------------------|-------------------------------------------------------------------------------------------------------------------------------------------------------------------------------------------------------------------------------------------------------------------------------------------------------------------------------------------------------------------------------------------------------------------|----------------------------------------------------------------------------|---------------------------------------------------------------------------------------------------------------------------------------------------------------------------------------------------------------------------------------------------------------------------------------------------------------------------------------------------------------------------------------------------------------------------------------------------------------------------------------------------------------------------------------------------------------------------------------------------------|-------------------------------------------------------------------------------------------------|--------------------------------------------------------------------------------------------------------------------------------------------------------------------------------------------------------------------------------------------------------------------------------------------------------------------------------------------------------------------------------------|
|                               |                                                                                                                                                                                                                                                                                                                                                                                                                   |                                                                            |                                                                                                                                                                                                                                                                                                                                                                                                                                                                                                                                                                                                         |                                                                                                 | no risk for: age (n=20), BMI, (7), malignant disease (6), smoking (6), pre-operative opioid (2)                                                                                                                                                                                                                                                                                      |
| Compagnoni 2019 <sup>24</sup> | To search the currently available literature regarding the influence of fibromyalgia on clinical outcomes of patients undergoing surgery for shoulder pain                                                                                                                                                                                                                                                        | 1 (specifically included in search keywords)                               | fibromyalgia                                                                                                                                                                                                                                                                                                                                                                                                                                                                                                                                                                                            | pain, NSAID consumption                                                                         | fibromyalgia 3/3                                                                                                                                                                                                                                                                                                                                                                     |
| Denboer 2006 <sup>25</sup>    | To summarize scientific evidence concerning the predictive value of bio-psychosocial risk factors with regard to the outcome after lumbar disc surgery - To provide an insight into the most relevant prognostic factors that could contribute to the identification and selection of patients at risk, as well as the development of tailored post-operative treatment methods based on the predictive variables | 23 (grouped into socio-demographic, clinical, work-related, psychological) | sociodemographic: gender, age, body weight, body length, education level and marital status; clinical: pre-operative status (including pre-operative pain and disability, other complaints and duration of complaints) and clinical signs (including segmental sensory loss, straight leg raising test, radiological findings and operative findings); work-related: a patient's physical work conditions, work satisfaction and duration of sick leave; psychological: depression, anxiety, somatization, coping strategies, life events and social support                                            | pain (investigated in 5 studies), disability, work capacity                                     | mostly positive evidence: pre-operative pain 2/3 and duration of pain 1/3; work satisfaction 1/2, duration of sick leave 1/2, anxiety 1/3, somatization, 1/2 coping 1/1; conflicting evidence: gender 1/3, depression 1/3; mostly negative evidence or no significant findings: age 1/3, marital status 1/2, pre-operative disability 0/2                                            |
| D'Onghia 2021 <sup>26</sup>   | To comprehensively characterize the available evidence on the consequences of pre-existent FM on the outcomes of orthopedic surgery                                                                                                                                                                                                                                                                               | 1 (specifically included in search keywords)                               | fibromyalgia                                                                                                                                                                                                                                                                                                                                                                                                                                                                                                                                                                                            | pain, functional status, patient satisfaction, opioid consumption, post-operative complications | fibromyalgia 25/25                                                                                                                                                                                                                                                                                                                                                                   |
| Dorow 2017 <sup>27</sup>      | To answer the following questions: 1. How does pain intensity in patients undergoing surgery for a lumbar herniated disc change over time? 2. Which socio-demographic, medical, occupational and psychological variables are associated with pain intensity in lumbar disc surgery patients?                                                                                                                      | 24 (grouped into socio-demographic, medical, work-related, psychological)  | sociodemographic: gender, age, education level; medical: pre-operative pain intensity, pre-operative intake of analgesics, pre-operative impaired fibrinolytic activity, pre-operative duration of complaints, neurological deficits complaints, disability, straight leg raising test, operative findings, radiological findings, smoking, weight; work-related: pre-operative working ability, duration of sick leave, physical work conditions, assessed chance to return to work within 3 months, workers' compensation; psychological: depression, anxiety, somatization, mental wellbeing, coping | pain                                                                                            | mostly positive evidence: female gender 3/9, pre-operative pain duration 3/8; conflicting evidence: higher age 5/9, lower educational level 1/1, smoking 1/3, weight 0/1, working ability 1/1, duration of sick leave 2/2, physical work condition 0/2, worker's compensation 1/1; mostly weak evidence: pre-operative pain intensity 5/6, neurological deficit 2/2, disability 3/4, |

|                            |                                                                                                                                                                        |                                                         |                                                                                                                                                                                                                                                                                                                                                                                                                                                                                                                                                                                           |                                               |                                                                                                                                                                                                                                                                                                                                                |
|----------------------------|------------------------------------------------------------------------------------------------------------------------------------------------------------------------|---------------------------------------------------------|-------------------------------------------------------------------------------------------------------------------------------------------------------------------------------------------------------------------------------------------------------------------------------------------------------------------------------------------------------------------------------------------------------------------------------------------------------------------------------------------------------------------------------------------------------------------------------------------|-----------------------------------------------|------------------------------------------------------------------------------------------------------------------------------------------------------------------------------------------------------------------------------------------------------------------------------------------------------------------------------------------------|
|                            |                                                                                                                                                                        |                                                         |                                                                                                                                                                                                                                                                                                                                                                                                                                                                                                                                                                                           |                                               | depression 7/8, anxiety 2/2, somatization 2/2, poor mental health 2/2, poor coping 3/3                                                                                                                                                                                                                                                         |
| Ghoshal 2023 <sup>28</sup> | To perform a systematic review and meta-analysis on the reported factors associated with PPSP after total hip joint and knee joint replacement                         | 8 (including additional factors as confounding factors) | age, gender, BMI, anxiety (state and trait), depression, pain catastrophizing, knee or hip joint pain or pain elsewhere in the body, comorbidities such as hypertension, diabetes, ischemic heart disease, chronic obstructive pulmonary disease, asthma, and neurological illnesses, [peri- and post-operative factors such as regional anesthesia, duration of surgery, acute post-operative pain]                                                                                                                                                                                      | pain                                          | younger age 4/35, female sex 4/29, BMI 5/12, anxiety 8/20, depression 8/21, pre-op pain (knee, hip, or elsewhere in the body) 20/33, comorbidities 7/7 (hypertension, diabetes, ischemic heart disease, chronic obstructive pulmonary disease, asthma, and neurological illnesses), pain catastrophizing 2/11                                  |
| Giusti 2021 <sup>29</sup>  | To clarify the role of psychological predictors of postsurgical pain to help clinicians to identify patients at risk for poor outcomes                                 | 32 psychological and psychosocial predictors            | depression, anxiety (state, trait, pain-related), catastrophizing, mental health, kinesiophobia, self-efficacy, coping, mental flexibility, mental cognition, stress, psychological distress, physical health, comorbidities, pain disability, social support, outcome expectancy, self-esteem, surgical fear, locus of control, illness perception, optimism, pessimism, psychological robustness, mood disorder, borderline personality, psychiatric diagnosis, somatization, expected pain control, activity expectation, expected pain                                                | pain                                          | depression 18/38, anxiety (include trait and state) 21/37, catastrophizing 16/28, mental health 7/11, kinesiophobia 2/12, self-efficacy 2/7, coping 3/10, psychological distress/stress 6/10, social support 3/7, surgical fear 1/5, somatization 1/3, optimism 3/5                                                                            |
| Goplen 2019 <sup>30</sup>  | To investigate the impact of preoperative opioid use on patient reported outcomes after total joint arthroplasty                                                       | 1 (specifically included in search keywords)            | pre-operative opioid use                                                                                                                                                                                                                                                                                                                                                                                                                                                                                                                                                                  | pain                                          | pre-operative opioids 6/6                                                                                                                                                                                                                                                                                                                      |
| Halicka 2022 <sup>31</sup> | To identify and evaluate preoperative predictors of pain and disability outcomes after spinal surgery for the treatment of chronic low back pain and/or radicular pain | 30 listed in table                                      | demographic factors (age, sex, and ethnicity), socioeconomic characteristics (education, work status, and workers' compensation), diagnosis (spinal pathology and sciatica), symptom duration, pain (intensity, quality, night-time pain, bothersomeness, and neuropathic component of pain), QST (sensory and pain thresholds, conditioned pain modulation), disability, comorbidities (comorbid conditions, body mass index, and smoking), pain-related psychological factors (pain catastrophizing, pain sensitivity, pain drawing, and kinesiophobia), affective-motivational (mental | pain (investigated in 13 studies), disability | sociodemographic: older age 1/3, education level 1/1, no association for: sex 0/4, ethnicity 0/1, work status 0/3, worker compensation 0/1; pre-operative pain and duration: type of spinal pathology 2/4, symptom duration 0/4, pain intensity 1/2; number of comorbidities 1/1, diabetes 1/1, better physical status 1/1, BMI 1/1, no effect |

|                                    |                                                                                                                                                                                                                                                       |                                          |                                                                                                                                                                                                                                                                                                                                                                                                                                                                                                                                                                                                                                     |                     |                                                                                                                                                                                                                                                                                                                                                                                                  |
|------------------------------------|-------------------------------------------------------------------------------------------------------------------------------------------------------------------------------------------------------------------------------------------------------|------------------------------------------|-------------------------------------------------------------------------------------------------------------------------------------------------------------------------------------------------------------------------------------------------------------------------------------------------------------------------------------------------------------------------------------------------------------------------------------------------------------------------------------------------------------------------------------------------------------------------------------------------------------------------------------|---------------------|--------------------------------------------------------------------------------------------------------------------------------------------------------------------------------------------------------------------------------------------------------------------------------------------------------------------------------------------------------------------------------------------------|
|                                    |                                                                                                                                                                                                                                                       |                                          | functioning, anxiety, depression, vitality, and job-related resignation), and personality factors (neuroticism)                                                                                                                                                                                                                                                                                                                                                                                                                                                                                                                     |                     | for disability 0/2, smoking; psychological factors: catastrophizing 1/2, anxiety 1/1 depression 1/2, no effect for pain severity 0/1, mental functioning 0/1                                                                                                                                                                                                                                     |
| Hernandez 2015 <sup>32</sup>       | To perform a systematic and critical review of the available literature to identify possible preoperative factors that impact postoperative pain in patients in whom THA and TKA are indicated                                                        | > 22 listed in table                     | age, sex, level of education, socioeconomic status, race, profession, underlying diseases (type, duration, etc), comorbidities, BMI, level of self-care ability, quality of life, pre-operative pain level (intensity, duration, etc), surgeon-related factors (age, sex, experience), waiting list, type of hospital, expectations, depression, anxiety, etc.                                                                                                                                                                                                                                                                      | pain                | younger age 6/18, older age 2/18 female 16/18, BMI (>35) 7/11, low socioeconomic status 1/1, low level of education 5/10, lack of social support 2/4, living alone 1/4, pre-surgery pain 12/13, comorbidities 4/11, low back pain 1/1, poor functional status 3/5, psychological factors (depression 3/3, anxiety 1/1, pain catastrophizing 2/2), poor pre-operative mental health 2/3, race 2/3 |
| Hinrichs-Rocker 2009 <sup>33</sup> | To develop an instrument for identifying patients at high risk for CPSP, to optimize clinical pain management and to identify and make a preliminary analysis of the relationship between psychosocial elements (predictors and correlates) and CPSP. | 34 listed in table                       | depression, psychological vulnerability, stress, psychological distress, late return to work, anxiety, health status and wellbeing, self-control, vitality, self-perception of recovery, higher pain relief expectation, sense of control over health, patient's decision making, psychological aspect of work, social support, marital status, household size, return to work/social activity, income, litigation/compensation, low mental health care, hospital where surgery performed, younger age, pre-operative state of neuroticism, female gender, employment, low education, race, surgeon performing surgery (experience) | pain                | depression 4/8, psychological vulnerability 3/4, psychological distress/stress 2/3, late return to work 3/3                                                                                                                                                                                                                                                                                      |
| Innocenti 2021 <sup>34</sup>       | To systematically review whether the altered central pain modulation has a significant influence on post-surgical outcomes in patients undergoing shoulder surgery due to musculoskeletal disorders                                                   | 9 listed                                 | Psychological Characteristics: depressive symptoms (included psychological distress), anxiety, pain catastrophizing, fear avoidance beliefs, self-efficacy; clinical manifestations of altered central pain modulation: presence of referred pain; quantitative sensory testing: hyperalgesia (punctate stimuli), temporal summation of suprathreshold heat pain response                                                                                                                                                                                                                                                           | pain, function, QOL | fear avoidance belief 2/2, psychological distress 1/2, depression 1/6, anxiety 1/5, somatization 1/1, pre-operative pain 1/1; no association for pain catastrophizing 0/1, self-efficacy 0/1,                                                                                                                                                                                                    |
| Lewis 2015 <sup>35</sup>           | To provide a systematic review and meta-analysis of                                                                                                                                                                                                   | 43 (including peri-operative predictors) | patient characteristic (Age, Gender, Education, Ethnicity, Work status, Income, Compensation); clinical                                                                                                                                                                                                                                                                                                                                                                                                                                                                                                                             | pain                | high strength of evidence: catastrophizing 3/3,                                                                                                                                                                                                                                                                                                                                                  |

|                             |                                                                                                                                                                                                   |                                                                            |                                                                                                                                                                                                                                                                                                                                                                                                                                                                                                                                                                                                                                           |                                                                          |                                                                                                                                                                                                                                                                                               |
|-----------------------------|---------------------------------------------------------------------------------------------------------------------------------------------------------------------------------------------------|----------------------------------------------------------------------------|-------------------------------------------------------------------------------------------------------------------------------------------------------------------------------------------------------------------------------------------------------------------------------------------------------------------------------------------------------------------------------------------------------------------------------------------------------------------------------------------------------------------------------------------------------------------------------------------------------------------------------------------|--------------------------------------------------------------------------|-----------------------------------------------------------------------------------------------------------------------------------------------------------------------------------------------------------------------------------------------------------------------------------------------|
|                             | predictor variables associated with persistent pain after total knee arthroplasty                                                                                                                 |                                                                            | (Preoperative pain, Weight, Comorbidities, Function, Other pain sites, Pain duration, Pain and function, Diagnosis, Previous contralateral TKA, Disease severity, Quantitative sensory testing), psychosocial (Depression, Social support, Mental health, Anxiety, Catastrophizing, Fear of movement, Self-efficacy, Expectations, Pessimism/optimism, Quality of life, Beliefs, Coping skills, Stress); perioperative (Patella resurfacing, Type of surgery, Implant type, Operative difficulty, Perioperative pain, Surgery duration) and biomechanical predictors (Chondromalacia, Varus/valgus angle, Fixed flexion, Gait parameters) |                                                                          | mental health 3/4, pre-operative pain 8/21, pain at other sites 1/2, comorbidities 4/11, and depression 4/6. Predictors with lower frequencies: age 7/19, gender 6/31, education 2/7, pain duration 1/3, social support 1/5, fear of movement 1/2, self-efficacy 1/2, coping skills 1/1       |
| Lim 2022 <sup>36</sup>      | To systematically review and meta-analyze the literature on risk factors of PPSP after breast and thoracic surgeries                                                                              | 34 for breast and 29 for thoracic (including per-and operative predictors) | breast surgery: age, BMI, diabetes, education; anxiety, depression, pain catastrophizing, smoking; pre-operative pain (plus cancer-, procedure- and treatment-related); thoracic surgery: age, BMI, comorbidities, sex, anxiety, depression, smoking, pre-operative pain (plus procedure- and treatment-related)                                                                                                                                                                                                                                                                                                                          | pain (analgesic consumption was considered a surrogate outcome for pain) | breast surgery: younger age 15/25, higher BMI 2/3, anxiety 3/5, depression 4/4, smoking 1/2, pre-operative pain 7/10, education 1/1; thoracic surgery: younger age 7/14, female sex 4/10, comorbidities 1/3, pre-operative pain 1/3, higher BMI 2/3, anxiety 1/2, depression 1/2, smoking 1/1 |
| Lungu 2016 <sup>37</sup>    | To answer which preoperative factors are most consistently associated with postoperative patient-reported pain and function up to 2 years following primary unilateral THA for hip osteoarthritis | 15 listed                                                                  | Age, gender, living alone, educational level, socioeconomic deprivation, surgery expectations, pre-operative pain, bodily pain, comorbidity, BMI, mental health, general physical health, lower radiographic OA severity, contralateral hip OA, greater widespread pain sensitivity                                                                                                                                                                                                                                                                                                                                                       | pain, function                                                           | lower educational status 3/3, pre-operative levels of pain 9/12, higher BMI index (>30) 6/10, more comorbidity 7/8, lower radiographical osteoarthritis severity, worse physical health 4/4, older age 4/11, living alone 1/1,                                                                |
| McCowat 2019 <sup>38</sup>  | To identify a broader range of psychological predictors of acute and chronic pain following breast cancer surgery through a systematic review of relevant prospective studies                     | 10 for chronic pain                                                        | Anxiety, depression, Catastrophizing, distress, alexythemia, affect, dispositional optimism, psychological robustness, disease-specific emotional functioning, pain response expectancies                                                                                                                                                                                                                                                                                                                                                                                                                                                 | pain (8 studies investigated pain >3 months after surgery)               | depression 3/6, anxiety 3/6, pain catastrophizing 0/1, alexithymia 1/1, psychological vulnerability 1/1, distress 1/1                                                                                                                                                                         |
| McKillop 2014 <sup>39</sup> | To examine the literature on depression as a prognostic factor of outcomes in patients                                                                                                            | 1 (specifically included in search keywords)                               | Depression                                                                                                                                                                                                                                                                                                                                                                                                                                                                                                                                                                                                                                | pain (investigated in 6 studies), disability,                            | depression 4/6                                                                                                                                                                                                                                                                                |

|                                 |                                                                                                                                                                                                                                                 |                                                |                                                                                                                                                                                                                                                                                                                                                                                                             |                                                                      |                                                                                                                                                                                                     |
|---------------------------------|-------------------------------------------------------------------------------------------------------------------------------------------------------------------------------------------------------------------------------------------------|------------------------------------------------|-------------------------------------------------------------------------------------------------------------------------------------------------------------------------------------------------------------------------------------------------------------------------------------------------------------------------------------------------------------------------------------------------------------|----------------------------------------------------------------------|-----------------------------------------------------------------------------------------------------------------------------------------------------------------------------------------------------|
|                                 | with lumbar spinal stenosis                                                                                                                                                                                                                     |                                                |                                                                                                                                                                                                                                                                                                                                                                                                             | symptom severity                                                     |                                                                                                                                                                                                     |
| Meert 2023 <sup>40</sup>        | To identify metabolic factors and inflammatory markers that are predictive of postoperative total TKA outcome                                                                                                                                   | 8 independent predictors listed in table       | Inflammatory markers and metabolic factors such as obesity, diabetes, hypertension, hypercholesterolemia, metabolic syndrome, Dyslipidemia, Synovitis, cytokine levels (various)                                                                                                                                                                                                                            | pain (investigated in 35 studies), functional disability, QOL        | BMI 10/27, diabetes 2/9, cytokine levels 3/3, Synovitis 1/1 with reverse effect (more severe pre-operative synovitis = less CPSP)                                                                   |
| Moloney 2021 <sup>41</sup>      | To (1) assess associations between psychological factors and pain after breast cancer (BC) treatment and (2) determine which preoperative psychological factors predicted pain in the acute, subacute, and chronic time frames after BC surgery | 13 assessed for pain >3 months                 | Depression, anxiety, pain catastrophizing, Alexithymia, psychological robustness, distress, locus of pain, coping, emotional functioning, mental health, emotional stability, somatization, pain vigilance and awareness                                                                                                                                                                                    | pain (34 studies assessed pain >3 months after surgery)              | depression 17/24, anxiety 13/19, pain catastrophizing 4/7, distress 4/6, mental health 3/3, psychological robustness 1/2, emotional functioning 1/2, alexithymia 1/1, somatization 1/1              |
| Ng 2021 <sup>42</sup>           | To compare clinical and functional outcomes of UKA in obese to non-obese patients                                                                                                                                                               | 1 (specifically included in search keywords)   | obesity (BMI>30kg/m2)                                                                                                                                                                                                                                                                                                                                                                                       | pain (investigated in 6 studies), function                           | obesity 4/6                                                                                                                                                                                         |
| Nunez Cortes 2022 <sup>43</sup> | To determine the effects of the cognitive and mental health factors on the outcomes after carpal tunnel release                                                                                                                                 | 7 listed                                       | Depression, anxiety, pain catastrophizing, self-efficacy, kinesiophobia, fear avoidance, mental health                                                                                                                                                                                                                                                                                                      | pain (investigated in 8 studies), function, patient satisfaction     | depression 5/6, anxiety 2/4, catastrophizing 1/1, mental health 1/1                                                                                                                                 |
| O'Connor 2022 <sup>44</sup>     | To determine the relationship between patient preoperative psychological factors and postoperative THA outcomes, specifically pain and function                                                                                                 | 6 listed                                       | psychological variables (depression, anxiety, pain catastrophizing, self-efficacy, somatization, optimism/pessimism)                                                                                                                                                                                                                                                                                        | pain (9 studies investigated pain >3 months after surgery), function | depression 5/5, anxiety 4/4, mental health 2/2, self-efficacy 1/1, pessimism 0/1                                                                                                                    |
| Olsen 2023 <sup>45</sup>        | To systematically review and synthesize preoperative and intraoperative factors associated with pain after total knee arthroplasty (TKA) in patients with osteoarthritis                                                                        | 61 (including peri-operative factors)          | patient characteristic (age, sex, education, ethnicity); clinical (preoperative pain, BMI, sleep, comorbidities, disability, physical functioning, pain at other sites, osteoarthritis severity); psychosocial (depression, anxiety, catastrophizing, kinesiophobia, self-efficacy, outcome expectations, coping, psychological distress, social support, mental health, opioid use); various perioperative | pain                                                                 | mental health (including anxiety, depression, psychological distress) 5/6, pain catastrophizing 3/4, self-efficacy 2/2, higher pre-op pain 4/4, other chronic pain 2/2, BMI 1/3, kinesiophobia 0/1, |
| Rogowsky 2022 <sup>46</sup>     | To address the question: what is the prevalence and severity of chronic pain in breast cancer patients who have undergone mastectomy with alloplastic IBR?                                                                                      | 9 listed (including peri-operative predictors) | age, ethnicity, (peri/post-operative: axillary dissection, lack of perioperative local anaesthetic, nurse-controlled analgesia as opposed to patient-controlled, acute postoperative pain, bilateral reconstruction, the use of a tissue expander and limited post-operative physiotherapy)                                                                                                                 | pain                                                                 | younger age (<65) 2/2                                                                                                                                                                               |
| Terradas 2021 <sup>47</sup>     | To investigate the influence of psychosocial factors                                                                                                                                                                                            | 9 listed                                       | anxiety, depression, pain catastrophizing, self-efficacy, psychological distress, fear of                                                                                                                                                                                                                                                                                                                   | pain, function                                                       | catastrophizing 10/14, kinesiophobia 2/3, anxiety 12/13,                                                                                                                                            |



|                                 |                                                                                                                                                                                      |                                                                                                                                                                                             |                                                                                                                                                                     |                                                               |                                                                                                                                                                       |
|---------------------------------|--------------------------------------------------------------------------------------------------------------------------------------------------------------------------------------|---------------------------------------------------------------------------------------------------------------------------------------------------------------------------------------------|---------------------------------------------------------------------------------------------------------------------------------------------------------------------|---------------------------------------------------------------|-----------------------------------------------------------------------------------------------------------------------------------------------------------------------|
|                                 | on pain and functional outcomes after KA at 6 and 12 months after surgery                                                                                                            |                                                                                                                                                                                             | movement, expectancies, mental health, social support                                                                                                               |                                                               | depression 7/13, self-efficacy 1/5, mental health1/1, psychological distress 1/3, pain expectancies 2/2, social support 0/1                                           |
| Theunissen 2012 <sup>48</sup>   | To investigate whether high levels of preoperative anxiety or pain catastrophizing are associated with an increased risk of CPSP                                                     | 2 (specifically included in search keywords)                                                                                                                                                | anxiety, pain catastrophizing (measured with 14 different instruments)                                                                                              | pain                                                          | anxiety 16/29, pain catastrophizing 16/29 (mainly musculoskeletal surgeries)                                                                                          |
| Van Bougaert 2022 <sup>49</sup> | To provide an updated overview of the predictive value of fear avoidance beliefs for outcomes following surgery for lumbar degenerative disease                                      | 1 (specifically but measured with various tools)                                                                                                                                            | fear avoidance belief including pain-related fear (kinesiophobia, fear of work-related activities, fear of physical activities), pain catastrophizing, pain anxiety | pain, function, QOL                                           | fear avoidance beliefs: pain catastrophizing 1/2, pain-anxiety 1/2, pain-related fear (kinesiophobia, fear of work-related activities, fear of physical activity) 0/3 |
| Varallo 2022 <sup>50</sup>      | To evaluate if preoperative and perioperative sleep disturbances and disorders are risk factors for CPSP                                                                             | 1 (included a variety of confounders: age, sex, depression, anxiety, catastrophizing, PTSD, BMI, somatization, smoking, pre-operative pain, socioeconomic status, pre-operative opioid use) | pre-operative (and peri-operative) sleep disturbances and disorders                                                                                                 | pain, post-operative opioid prescription from medical records | preoperative (and perioperative) sleep disturbances and disorders 11/16                                                                                               |
| Wluka 2020 <sup>51</sup>        | To determine whether questionnaire identified neuropathic-like pain and/or sensitization predicts those who are more likely to experience poor outcomes after knee joint replacement | 1 (specifically included in search keywords)                                                                                                                                                | neuropathic-like pain or central pain sensitization                                                                                                                 | pain, function, satisfaction                                  | neuropathic-like pain/pain sensitization 4/6                                                                                                                          |
| Zhao 2023 <sup>52</sup>         | To explore the prognostic value of fear-avoidance beliefs on postoperative pain and back-specific function for patients with lumbar degenerative disk disease                        | 1 (specifically included in search keywords)                                                                                                                                                | fear avoidance beliefs                                                                                                                                              | pain, function                                                | fear avoidance beliefs 6/6                                                                                                                                            |

## 2D: Quality (Q) of evidence, risk of bias (RoB), appraisal tools, and study limitations

| Reference                      | Analysis method                                           | Strength/quality (Q) of evidence for RF association to CPSP                                                                                                                                                                                                      | Risk of bias (RoB) and quality (Q) of primary studies                                                   | Appraisal tool used for review bias and level of evidence/Quality                                                       | main study limitations                                                                                                                                                                                                                                                                       |
|--------------------------------|-----------------------------------------------------------|------------------------------------------------------------------------------------------------------------------------------------------------------------------------------------------------------------------------------------------------------------------|---------------------------------------------------------------------------------------------------------|-------------------------------------------------------------------------------------------------------------------------|----------------------------------------------------------------------------------------------------------------------------------------------------------------------------------------------------------------------------------------------------------------------------------------------|
| Achttien 2021 <sup>17</sup>    | narrative synthesis                                       | low certainty evidence                                                                                                                                                                                                                                           | 2/16 low RoB, 14/16 high RoB                                                                            | QUIPS, GRADE                                                                                                            | Mixed diagnosis in primary studies, heterogeneity of surgical indications and techniques, Inconsistency between studies of prognostic factors and outcome measures, poor reporting, inability to identify prognostic factors for LSFS for specific diagnoses because of the mixed diagnoses. |
| Andreoletti 2022 <sup>18</sup> | random effect model, meta-analysis                        | Quality of evidence low to moderate (low for female sex, low for pain, moderate for younger age)                                                                                                                                                                 | 14/71 high RoB,                                                                                         | QUIPS, GRADE                                                                                                            | Heterogeneity of methodologies of primary studies, low sample sizes for 25% of studies, low quality of evidence for sex and preoperative pain risk factors, sample size in most studies was <200.                                                                                            |
| Ashooron 2023 <sup>19</sup>    | sensitivity analysis, meta-analysis                       | Significant association or younger age and pain catastrophizing; moderate association for female sex, pre-op pain, non-white race, and comorbid diabetes; no significant association for BMI, pre-op ROM (range of motion), and unilateral versus bilateral TKA. | 22/30 (73%) high RoB for at least one criterion                                                         | GRADE                                                                                                                   | Assumption in the imputation approach (assuming the correlation between age categories was zero), can exaggerate the variances resulting in a wider confidence interval.                                                                                                                     |
| Burns 2015 <sup>20</sup>       | narrative synthesis                                       | Quality rating between 61 and 86%                                                                                                                                                                                                                                | Quality rating between 61 and 86%                                                                       | checklist based on an established quality assessment instrument from the orthopedic literature with 14 quality criteria | Publication bias, meta-analysis not possible due to heterogeneity.                                                                                                                                                                                                                           |
| Celestin 2009 <sup>21</sup>    | descriptive analysis                                      | strength of evidence labeled as positive or mixed                                                                                                                                                                                                                | not reported                                                                                            | no rating tool reported                                                                                                 | Study heterogeneity prevented meta-analytic methods, some studies may have been omitted, difference in indications for spine surgery makes a comparison of findings across studies difficult, use of unvalidated measures of predictor variables and outcome variable                        |
| Chidambaran 2020 <sup>22</sup> | descriptive analysis, meta-analysis                       | marginal                                                                                                                                                                                                                                                         | good Q for all studies (scores ranged from 46 to 70 with/without control groups)                        | STREGA, Q-Genie tool                                                                                                    | Heterogeneity in the data and methodology makes it difficult to draw accurate conclusions.                                                                                                                                                                                                   |
| Clephas 2023 <sup>23</sup>     | descriptive analysis, sensitivity analysis, meta-analysis | Pre-op pain and ASA physical status have high quality of evidence. other predictors have low (required                                                                                                                                                           | high risk for study participation (n=14), high risk for attrition (n=12), high risk outcome measurement | QUIPS, GRADE                                                                                                            | Inadequate power reduced the certainty of evidence                                                                                                                                                                                                                                           |

|                               |                                                            |                                                                                                                                                                                                                          |                                                                                                                                                         |                                                                                                                                     |                                                                                                                                                                                                                                                                                                                                               |
|-------------------------------|------------------------------------------------------------|--------------------------------------------------------------------------------------------------------------------------------------------------------------------------------------------------------------------------|---------------------------------------------------------------------------------------------------------------------------------------------------------|-------------------------------------------------------------------------------------------------------------------------------------|-----------------------------------------------------------------------------------------------------------------------------------------------------------------------------------------------------------------------------------------------------------------------------------------------------------------------------------------------|
|                               |                                                            | information size not reached).                                                                                                                                                                                           | (n=6), high risk for confounding measures (n=18). outside of confounding overall RoB appears low.                                                       |                                                                                                                                     |                                                                                                                                                                                                                                                                                                                                               |
| Compagnoni 2019 <sup>24</sup> | narrative synthesis                                        | low, Quality reduced because of limitations                                                                                                                                                                              | no scores reported                                                                                                                                      | Cochrane handbook guidelines, NOS                                                                                                   | Non-randomized observational studies (three retrospective and one prospective) in general provide a low quality of evidence. None of the studies were designed to directly compare two different cohorts (patients with versus without fibromyalgia syndrome). Risk of bias due to several study limitations reduces the quality of evidence. |
| Denboer 2006 <sup>25</sup>    | descriptive synthesis                                      | categorized in positive/preliminary, conflicting, or negative/preliminary negative evidence                                                                                                                              | not rated due to heterogeneity                                                                                                                          | None used                                                                                                                           | Small patient sample size in the selected trials can result in an overestimation of the true effects of predictors. Studies used a composite score rather than specific outcomes. Univariate statistics and other methodological issues did not allow for results pooling or study quality assessment.                                        |
| D'Onghia 2021 <sup>26</sup>   | descriptive synthesis, meta-analysis, random effects model | reported strong evidence                                                                                                                                                                                                 | 10/27 good Q, 10/27 fair Q, 7/27 poor Q                                                                                                                 | NHLBI-NIH                                                                                                                           | Possible misclassification bias, fibromyalgia diagnosed based on EMR and not validated clinically. Further bias possibly through the use of retrospective cohort studies of moderate quality, based on data from large electronic medical records (EMR) databases.                                                                            |
| Dorow 2017 <sup>27</sup>      | descriptive synthesis                                      | categorized in positive/preliminary, conflicting, or negative/preliminary negative evidence                                                                                                                              | 14/21 fair Q, 7/21 poor Q                                                                                                                               | Modified DB checklist (scores are divided into 4 quality categories: excellent (26–28), good (20–25), fair (15–19), and poor (<14)) | Possible publication bias for missed articles; meta-analysis could not be performed due to the heterogeneity of pain-related data and differences in predictor variables across studies.                                                                                                                                                      |
| Ghoshal 2023 <sup>28</sup>    | qualitative summary, meta-analysis                         | younger age, female sex and BMI low strength of evidence; anxiety (state but not trait), depression, and pain catastrophizing high to variable strength, comorbidities high evidence, pain in other parts high evidence, | overall medium to low RoB                                                                                                                               | alternative method for appraisal based on 3 main criteria                                                                           | No limitations mentioned                                                                                                                                                                                                                                                                                                                      |
| Giusti 2021 <sup>29</sup>     | narrative synthesis, meta-analysis                         | high Q supports anxiety, optimism, psychological distress; weak: depression, catastrophizing, mental health, self-efficacy, kinesiphobia,                                                                                | 15/73 high Q, 29/73 medium Q, 29/73 low Q; low RoB: attrition 41/73, predictor measurement 50/73, outcome measurement 63/73, statistical analysis 30/73 | QUIPS                                                                                                                               | Estimates from meta-analyses were based on heterogeneous data sets: studies were different regarding samples, sample characteristics, measurement instruments used to assess predictors and outcomes, follow-up duration, and statistical analyses.                                                                                           |
| Goplen 2019 <sup>30</sup>     | random effect                                              | justified (3 papers), not stated (3 papers)                                                                                                                                                                              | 3/6 moderate RoB, 3/6 high RoB                                                                                                                          | JB critical appraisal check                                                                                                         | Low number of studies; use of different analytic approaches,                                                                                                                                                                                                                                                                                  |

|                                    | model, meta-analysis                 |                                                                                                                                                                                                                         |                                                                                                                                 | list for Cohort Studies                                                                                                   | outcome measures and follow-up periods.                                                                                                                                                                                                                                                      |
|------------------------------------|--------------------------------------|-------------------------------------------------------------------------------------------------------------------------------------------------------------------------------------------------------------------------|---------------------------------------------------------------------------------------------------------------------------------|---------------------------------------------------------------------------------------------------------------------------|----------------------------------------------------------------------------------------------------------------------------------------------------------------------------------------------------------------------------------------------------------------------------------------------|
| Halicka 2022 <sup>31</sup>         | tabular summary, narrative synthesis | moderate evidence Q for symptom duration, low evidence Q for demographic and socioeconomic factors, very low evidence for the neg value of pre-operative pain, comorbidities, depression, anxiety, pain catastrophizing | 14/21 high RoB, 7/21 low RoB                                                                                                    | QUIPS, GRADE                                                                                                              | Quantitative synthesis was not possible because many prognostic factors were only assessed in single studies and the remaining studies were too heterogeneous in terms of analysis types and outcomes and predictor definitions; most studies suffer from uncertain or low evidence.         |
| Hernandez 2015 <sup>32</sup>       | descriptive summary                  | highly variable                                                                                                                                                                                                         | moderate Q,                                                                                                                     | Oxford CEBM quality scale                                                                                                 | No limitations mentioned                                                                                                                                                                                                                                                                     |
| Hinrichs-Rocker 2009 <sup>33</sup> | tabular summary, narrative synthesis | grade of association (1=association likely, 2=inconclusive, 3=association not likely) was applied to all predictors                                                                                                     | not recorded                                                                                                                    | Evidence grading tool - unclear source                                                                                    | Variability of the existing studies, which precluded formal meta-analysis.                                                                                                                                                                                                                   |
| Innocenti 2021 <sup>34</sup>       | qualitative synthesis                | not reported                                                                                                                                                                                                            | 5/11 low RoB, 6/11 moderate RoB                                                                                                 | QUIPS                                                                                                                     | Absence of a quantitative analysis (meta-analysis) due to substantial heterogeneity in terms of outcome measures and characteristics of the studies included. Studies may have been missed (especially from some grey literature sources) despite comprehensive, PICO-based search analysis. |
| Lewis 2015 <sup>35</sup>           | descriptive analysis, meta-analysis  | determined in frequency of association to CPSP                                                                                                                                                                          | moderate RoB (median score of 7, range from 3-10 of 13 max)                                                                     | custom checklist                                                                                                          | Excluded data from studies that combined THA and TKA patients; many predictor variables did not have a sufficient number of analyses to conduct a meaningful meta-analysis; marked heterogeneity in the study designs, statistical analyses, and risk of bias scores.                        |
| Lim 2022 <sup>36</sup>             | descriptive synthesis, meta-analysis | significance reported narratively                                                                                                                                                                                       | breast surgeries: ca 81/126 low, 30/126 unclear, 15/126 high RoB; thoracic surgery: 110/143 low, 26/143 unclear, 7/143 high RoB | use of a three-category rating system                                                                                     | Data on PPSP prevalence were aggregated from studies with various designs, both prospective and retrospective; reporting of PPSP was inconsistent; publication bias cannot be ruled out.                                                                                                     |
| Lungu 2016 <sup>37</sup>           | descriptive summary                  | significance reported narratively                                                                                                                                                                                       | moderate-to-high Q (mean score 81.0% ± 10.3% (min=66.7%, max=100%))                                                             | modified version of the methodology checklist for prognostic studies. [Hayden JA et al. Ann Intern Med. 2006;144:427-437] | Study heterogeneity limited the pooled assessment of the strength of associations between the preoperative variables and THA outcomes.                                                                                                                                                       |
| McCowat 2019 <sup>38</sup>         | qualitative data synthesis           | Weak/limited for all risk factors                                                                                                                                                                                       | 11/12 good Q, 1/12 fair Q                                                                                                       | NHLBI-NIH                                                                                                                 | Possible publication bias; review was limited to prospective studies thus, the role of other psychological factors, assessed in other study designs, may merit future consideration.                                                                                                         |

|                                 |                                                             |                                                                                                                       |                                                                                                                                                                                             |                                                                                                                                    |                                                                                                                                                                                                                                                                                                                                        |
|---------------------------------|-------------------------------------------------------------|-----------------------------------------------------------------------------------------------------------------------|---------------------------------------------------------------------------------------------------------------------------------------------------------------------------------------------|------------------------------------------------------------------------------------------------------------------------------------|----------------------------------------------------------------------------------------------------------------------------------------------------------------------------------------------------------------------------------------------------------------------------------------------------------------------------------------|
| McKillop 2014 <sup>39</sup>     | best evidence synthesis, tabular summary                    | Mixed strength of evidence                                                                                            | 13/13 judged to be scientifically admissible (=reasonable validity)                                                                                                                         | a critical review form adapted from the Quebec Task Force (QTF) on Whiplash-Associated Disorders                                   | Increasing risk of selection bias through high attrition rates, suboptimal analysis strategies, use of arbitrary and unvalidated cut-off scores for the outcome measures, inadequate sample sizes for the statistical analyses.                                                                                                        |
| Meert 2023 <sup>40</sup>        | tabular summary, narrative synthesis                        | conflicting evidence                                                                                                  | 1/49 low; 10/49 moderate; 38/49 high                                                                                                                                                        | QUIPS, EBRO                                                                                                                        | Known confounding factors were not taken into account; many different outcome measures were used; and a widely varying follow-up period.                                                                                                                                                                                               |
| Moloney 2021 <sup>41</sup>      | effect size correlation, meta-analysis, descriptive summary | weak but significant                                                                                                  | 6/47 high RoB, 19/47 moderate RoB, 21/47 low RoB                                                                                                                                            | NOQAT                                                                                                                              | The liberal inclusion criteria and the analyses of univariate as well as multivariate associations may have led to stronger pooled effects; inclusion of participants with Stage 0 to Stage 3 cancer with likely different treatment profiles which was not controlled for in these analyses.                                          |
| Ng 2021 <sup>42</sup>           | random effects model, meta-analysis                         | moderate level of evidence                                                                                            | Moderate Quality of evidence for RoB (mean MINORS score was 14.2 (range 11 – 19).)                                                                                                          | OCEBM, MINORS                                                                                                                      | Primarily retrospective data, variable reporting of outcomes in individual studies; inconsistent reporting of confounding factors.                                                                                                                                                                                                     |
| Nunez Cortes 2022 <sup>43</sup> | narrative analysis, random effects model, meta-analysis     | Depression (moderate), others (association, not further specified)                                                    | 13/15 low RoB, 2/15 high RoB                                                                                                                                                                | QUIPS                                                                                                                              | Lack of measurement of the cognitive and mental health factors that may influence the CTR outcomes beyond those identified in the available studies; no studies were found evaluating some of the psychosocial factors included in our search strategy (i.e. fear avoidance, kinesiophobia); modulating variables were not considered. |
| O'Connor 2022 <sup>44</sup>     | tabular summary, narrative synthesis                        | moderate levels: depression and anxiety; low levels: optimism/pessimism, pain catastrophizing, self-efficacy          | 4/21 high; 17/21 low                                                                                                                                                                        | GRADE and RoB criteria                                                                                                             | Not adjusting for confounders and failing to address patient attrition.                                                                                                                                                                                                                                                                |
| Olsen 2023 <sup>45</sup>        | random effects model, meta-analysis, qualitative synthesis  | low to moderate certainty                                                                                             | low RoB for prognostic factor measurement (n = 16) and outcome measurement (n = 21); high RoB for study participation (n = 12), study attrition (n = 16), and statistical analysis (n = 13) | QUIPS, GRADE                                                                                                                       | Included studies were largely heterogeneous for measurement of factors; choice of wider eligibility criteria might include more heterogeneity.                                                                                                                                                                                         |
| Rogowsky 2022 <sup>46</sup>     | narrative (scoping review)                                  | not reported                                                                                                          | not reported                                                                                                                                                                                | None used                                                                                                                          | Significant differences in patient sample size and post-surgery follow-up timing.                                                                                                                                                                                                                                                      |
| Terradas 2021 <sup>47</sup>     | narrative synthesis                                         | strong evidence: catastrophizing, anxiety, depression; moderate evidence: kinesiophobia, self-efficacy, mental health | RoB not reported; 22/22 good Q with average of 7.22+/- 0.92 (included were only studies with rating >6)                                                                                     | NOS, and for qualitative analysis of selected studies the categorization proposed by Furlan et al was used. [Furlan A et al. Spine | Significant heterogeneity between studies in terms of outcome measurements and statistical analyses.                                                                                                                                                                                                                                   |

|                                 |                                                          |                                                                                      |                                                                                          |                                                                                                                           |                                                                                                                                                                                                                                                                                                      |
|---------------------------------|----------------------------------------------------------|--------------------------------------------------------------------------------------|------------------------------------------------------------------------------------------|---------------------------------------------------------------------------------------------------------------------------|------------------------------------------------------------------------------------------------------------------------------------------------------------------------------------------------------------------------------------------------------------------------------------------------------|
| Theunissen 2012 <sup>48</sup>   | descriptive analysis, random effect model, meta-analysis | small to moderate effect size                                                        | RoB not reported; high Q (scoring between 5 and 8: 5 (10%), 6 (42%), 7 (17%) or 8 (31%)) | JBI Critical Appraisal Checklist for Cohort/Case-Control studies, and adapted checklist for measuring study quality by DB | The main bias in the review process was related to the heterogeneity in the measurement and reporting of predictors, outcome measures, and in statistical analyses, making comparison of results difficult. The pooled results should be interpreted with caution.                                   |
| Van Bougaert 2022 <sup>49</sup> | descriptive synthesis                                    | moderate evidence: pain-related fear; conflicting evidence: catastrophizing, anxiety | high risk of bias                                                                        | QUIPS                                                                                                                     | Methodological differences between the included studies were too large to allow performing a relevant meta-analysis; included only patient-reported outcome measures as used by spine registries; the findings cannot be extrapolated to all surgery outcomes following lumbar degenerative disease. |
| Varallo 2022 <sup>50</sup>      | narrative synthesis, meta-analysis                       | low certainty of evidence                                                            | 3/18 low RoB, 1/18 high RoB, 14/18 mixed depending on factor                             | QUIPS, GRADE                                                                                                              | Use of different questionnaires and cutoff scores to evaluate sleep may have captured various aspects of sleep; there is a need for a clear and consistent definition of sleep disturbance and sleep disorders across studies.                                                                       |
| Wluka 2020 <sup>51</sup>        | narrative analysis, random effects model, meta-analysis  | limited evidence                                                                     | Mixed results in 14 questions, none of the 5 papers was satisfactory in all points       | NHLBI-NIH                                                                                                                 | Low number of included studies; studies did not account for other factors that have been shown to affect pain such as catastrophizing and fear avoidance.                                                                                                                                            |
| Zhao 2023 <sup>52</sup>         | fixed effect meta-analysis                               | not graded but stated low Q due to limited number of studies                         | 3/6 high; 3/6 moderate; overall low Q                                                    | modified QUIPS                                                                                                            | Low quality of meta-analysis due to limited number of included studies.                                                                                                                                                                                                                              |

Abbreviations: DB: Downs & Black checklist; EBRO: Evidence Based Guideline Development; GRADE: Grading of Recommendations, Assessment, Development and Evaluations tool; MINOR: Methodological Index for Non-Randomized Studies; NHLBI-NIH: National Institutes of Health (NIH) Quality Assessment Tool for Observational Cohort and Cross-Sectional Studies; NOS: Newcastle–Ottawa assessment scale scores for the included studies; OCEBM: Oxford Centre for Evidence-Based Medicine criteria; QUPIS: Quality In Prognosis Studies; STREGA: Strengthening the REporting of Genetic Association studies.
